# Supplementary material for: Kinetics of cesium lead halide perovskite nanoparticle growth; focusing and de-focusing of size distribution
Source: Royal Society of Chemistry journal article supplement (doi:10.1039/c5nr09127f), 2016-01-01
Supplement: c5nr09127f1.pdf [file c5nr09127f1.pdf]

## Supplementary Information

### Kinetics of Cesium Lead halide perovskite Nanoparticle growth; Focusing and De-focusing of size distribution

Miriam Koolyk, Daniel Amgar, Sigalit Elboher, Lioz Etgar\*

The Hebrew University of Jerusalem, Institute of Chemistry, Casali Center for Applied  
Chemistry, Jerusalem 91904, Israel

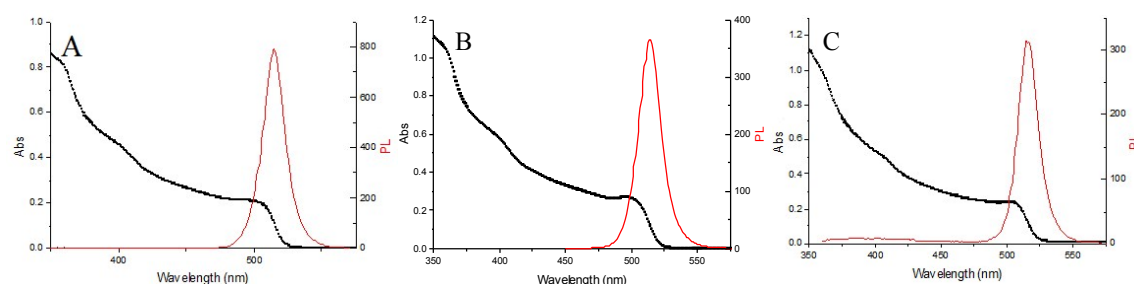

Figure 1S: CsPbBr<sub>3</sub> absorption and PL at (A) 1 seconds growth duration, (B) 20 seconds growth duration and (C) 40 seconds growth duration.

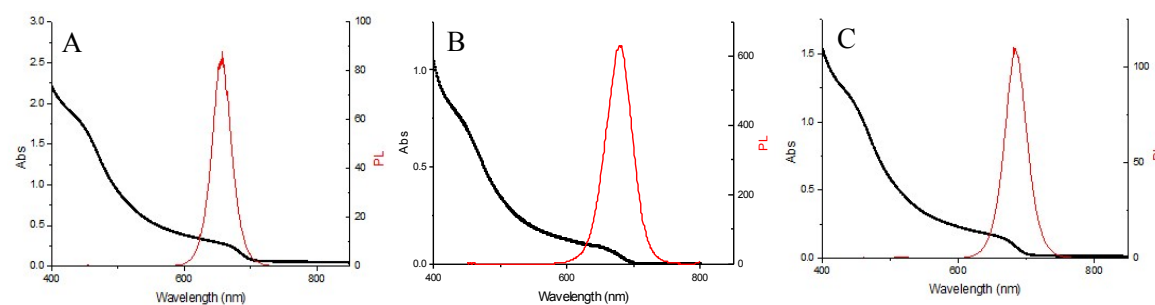

Figure 2S: CsPbI<sub>3</sub> absorption and PL at (A) 1 seconds growth duration, (B) 20 seconds growth duration and (C) 40 seconds growth duration.
